# Supplementary material
Source: MDPI journal article supplement (https://www.mdpi.com/2071-1050/15/19/14467)
Supplement: s1 [file s1]

Archive with 2 entries (2 files):
- SCD example for supplementary material.jpg
- sustainability-2603977-supplementary material.pdf
