# Supplementary material
Source: MDPI journal article supplement (https://www.mdpi.com/2071-1050/15/19/14467)

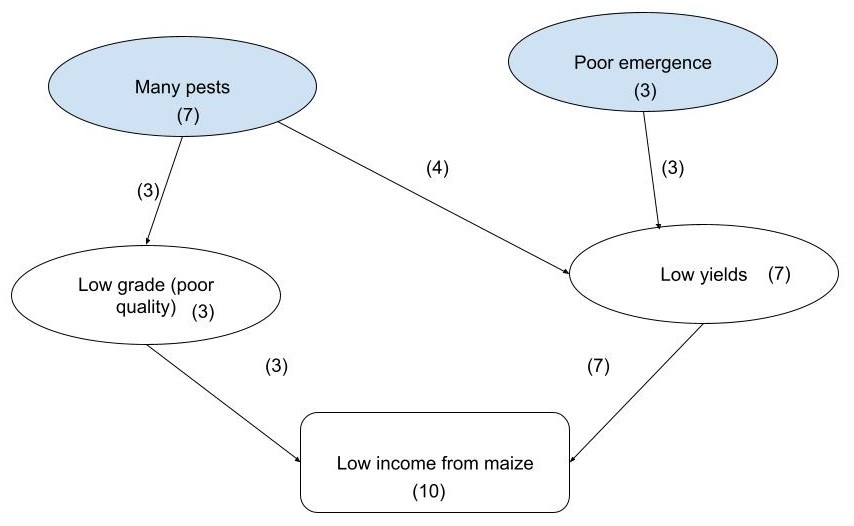

Supplement: s1 [file s1 › SCD example for supplementary material.jpg]
